# Supplementary material for: Utility of SpO2/FiO2 ratio for acute hypoxemic respiratory failure with bilateral opacities in the ICU
Source: PLoS One. 2021 Jan 25;16(1):e0245927. doi: 10.1371/journal.pone.0245927 (PMC7833145; doi:10.1371/journal.pone.0245927)
Supplement: S1 Table — (XLSX) [file pone.0245927.s001.xlsx]

## Sheet: Supporting Information
NO.	PaO2 24h	SpO2 24h	FiO2 24h	S/F	P/F	Sex	Age	Disease	smoking history PPY	COPD	Hypertension	Coronary artery disease	diabetes mellitus	cancer	autoimmune disease	chronic kidney disease	chronic disease point	length of ICU stay	length of hospital stay	length of intubation	Ventilator free days until day28	tracheostomy	death in ICU	28days mortality	60days mortality	death in hospital	steroid	sivelestat sodium	BMI	SAPS Ⅱ	APACHEⅡ	SOFA
1	82.7	99	40	247.5	206.75	1	32	Viral/Pneumocystis pneumonia	0	0	0	0	1	0	0	0	0	9	17	8	21	0	0	0	0	0	0	1	24.6548	63	27	13
2	95.9	100	50	200	191.8	1	41	Viral/Pneumocystis pneumonia	19	0	0	0	0	1	0	0	0	7	28	5	23	0	0	0	0	0	1	0	19.4794	49	13	11
3	94.3	97	60	161.667	157.167	1	42	Bacterial pneumonia	0	0	0	0	0	0	0	0	0	8	14	6	22	0	0	0	0	0	0	0	21.1454	78	35	18
4	110.7	100	30	333.333	369	1	44	Bacterial pneumonia	0	0	1	0	1	0	0	0	0	5	22	4	24	0	0	0	0	0	1	1	#REF!	58	23	12
5	68.9	96	60	160	114.833	1	45	Viral/Pneumocystis pneumonia	25	0	0	0	1	0	0	0	0	9	16	7	21	0	0	0	0	0	1	0	#REF!	63	27	13
6	81.1	97	35	277.143	231.714	1	47	Bacterial pneumonia	15	0	0	0	0	0	0	0	0	4	10	2	26	0	0	0	0	0	1	0	#REF!	44	22	15
7	86.6	97	50	194	173.2	1	47	Viral/Pneumocystis pneumonia	0	0	0	0	0	0	1	0	5	35	90	39	0	1	0	0	0	0	1	0	23.1473	78	34	13
8	77.3	94	40	235	193.25	1	48	Other	33	1	0	0	0	1	1	0	0	6	62	4	24	0	0	0	0	0	0	0	15.4699	60	23	9
9	67.9	90	60	150	113.167	1	48	Other	0	0	0	0	0	0	0	0	5	11	36	7	21	0	0	0	0	0	1	1	18.1662	42	24	9
10	82.2	95	50	190	164.4	1	51	Bacterial pneumonia	10	0	0	0	1	0	0	1	0	8	17	7	21	0	0	0	0	0	1	0	#REF!	49	25	14
11	100.4	99	30	330	334.667	1	51	Other	60	0	1	0	0	0	0	1	0	4	29	3	25	0	0	0	0	0	0	0	25.565	85	34	20
12	117	92	55	167.273	212.727	2	53	Interstitial lung disease	0	0	0	0	0	0	0	0	0	11	25	6	22	0	0	0	0	0	1	0	#REF!	42	19	13
13	129.3	100	50	200	258.6	2	53	Bacterial pneumonia	0	0	0	0	0	0	0	0	0	4	15	2	26	0	0	0	0	0	0	0	#REF!	49	20	9
14	78.9	92	70	131.429	112.714	1	53	Interstitial lung disease	60	1	0	0	0	0	0	0	0	25	25	13	15	0	1	1	1	1	1	0	#REF!	82	36	16
15	106.7	98	100	98	106.7	1	53	Interstitial lung disease	45	1	0	0	0	0	0	0	5	3	3	3	0	0	1	1	1	1	1	1	19.3939	79	46	14
16	82.8	94	35	268.571	236.571	1	55	Interstitial lung disease	35	1	0	0	1	0	0	0	0	7	17	6	22	0	0	0	0	0	1	0	#REF!	59	29	14
17	78.9	98	60	163.333	131.5	1	55	Bacterial pneumonia	35	1	1	0	1	0	0	1	5	34	43	30	0	1	0	0	1	0	1	1	#REF!	76	41	16
18	91	98	40	245	227.5	2	57	Bacterial pneumonia	0	0	1	1	1	0	0	0	0	10	21	3	25	0	0	0	0	0	1	0	#REF!	37	21	9
19	95.1	93	50	186	190.2	1	58	Viral/Pneumocystis pneumonia	38	1	0	0	0	0	0	0	0	7	21	5	23	0	0	0	0	0	1	0	#REF!	53	24	12
20	61.5	98	30	326.667	205	1	58	Interstitial lung disease	40	1	0	0	0	0	0	0	0	7	13	4	24	0	0	0	0	0	1	0	#REF!	55	32	11
21	112	94	80	117.5	140	1	58	Aspiration pneumonia	20	0	0	0	0	1	0	0	5	19	19	19	0	1	1	1	1	1	1	0	#REF!	65	37	14
22	67.9	88	50	176	135.8	1	60	Viral/Pneumocystis pneumonia	20	0	1	0	0	0	0	0	0	10	20	6	22	0	0	0	0	0	0	0	#REF!	58	23	11
23	98.5	96	50	192	197	2	60	Interstitial lung disease	0	0	1	0	0	1	1	0	0	6	18	4	24	0	0	0	0	0	1	0	#REF!	55	25	10
24	104.6	100	40	250	261.5	2	62	Bacterial pneumonia	60	0	0	1	0	0	0	0	0	7	25	5	23	0	0	0	0	0	0	0	16.1778	58	31	12
25	76.6	95	50	190	153.2	1	62	Bacterial pneumonia	54	1	1	0	1	0	1	0	0	5	28	4	24	0	0	0	0	0	0	0	#REF!	88	36	15
26	74.4	95	70	135.714	106.286	1	63	Other	43	1	0	0	1	0	0	0	0	53	136	136	0	1	0	0	0	0	1	0	#REF!	82	32	15
27	94.5	97	35	277.143	270	2	64	Interstitial lung disease	0	0	0	0	0	0	0	0	0	5	15	2	26	0	0	0	0	0	1	0	#REF!	70	29	14
28	83.6	94	50	188	167.2	1	64	Interstitial lung disease	60	0	1	0	1	0	1	1	5	24	35	24	0	0	1	0	1	1	1	0	19.8171	61	33	15
29	69.3	93	75	124	92.4	1	65	Interstitial lung disease	0	0	1	0	0	0	0	0	0	8	32	7	21	0	1	0	1	1	1	0	#REF!	46	27	10
30	76.1	96	80	120	95.125	2	66	Interstitial lung disease	45	0	0	0	0	1	0	0	0	5	24	13	15	0	0	1	1	1	0	1	18.8672	51	29	14
31	75.2	97	55	176.364	136.727	1	66	Bacterial pneumonia	30	1	1	0	0	1	0	0	0	13	140	17	11	0	0	0	0	0	1	0	#REF!	74	34	12
32	100	97	40	242.5	250	2	66	Bacterial pneumonia	0	0	1	0	0	0	0	0	0	12	28	9	19	0	0	0	0	0	1	0	#REF!	59	34	16
33	118.3	98	60	163.333	197.167	2	66	Interstitial lung disease	0	0	1	1	1	1	0	0	5	22	69	58	0	1	0	0	0	1	1	1	17.7939	64	38	13
34	91.3	98	30	326.667	304.333	1	67	Bacterial pneumonia	44	0	1	1	1	0	0	0	0	5	25	4	24	0	0	0	0	0	1	1	#REF!	53	24	15
35	142.8	100	40	250	357	2	67	Other	0	0	0	0	0	0	0	0	5	15	119	89	0	1	0	0	0	0	0	0	12.3452	79	32	18
36	136.6	99	85	116.471	160.706	1	67	Interstitial lung disease	60	1	1	1	0	1	0	0	5	8	10	8	0	0	1	1	1	1	1	0	#REF!	72	38	16
37	84.2	88	60	146.667	140.333	1	68	Viral/Pneumocystis pneumonia	0	0	0	0	0	0	0	0	0	30	34	22	6	0	0	0	0	0	0	0	#REF!	49	17	11
38	70.7	95	85	111.765	83.1765	1	68	Interstitial lung disease	50	0	0	0	0	0	0	0	0	6	16	11	0	0	1	1	1	1	1	0	27.6799	37	21	9
39	54.7	92	90	102.222	60.7778	1	68	Bacterial pneumonia	46	1	0	0	0	0	0	0	0	31	52	52	0	1	0	0	1	1	1	1	#REF!	41	22	14
40	86.9	96	45	213.333	193.111	1	68	Interstitial lung disease	21	0	1	1	0	1	0	0	5	9	59	7	21	0	0	0	0	0	1	1	#REF!	68	33	15
41	75.9	99	30	330	253	1	68	Bacterial pneumonia	0	0	0	0	1	0	0	0	0	26	56	19	9	0	0	0	0	0	1	0	#REF!	99	38	19
42	90.2	99	35	282.857	257.714	1	69	Bacterial pneumonia	49	1	1	0	0	1	0	0	0	10	74	74	0	1	0	0	0	0	1	0	#REF!	50	25	12
43	86.7	97	40	242.5	216.75	1	69	Interstitial lung disease	135	0	0	0	1	0	0	0	5	121	207	207	0	1	0	0	0	1	0	1	16.4101	36	27	9
44	61.4	90	60	150	102.333	1	70	Bacterial pneumonia	0	0	1	0	1	1	0	0	5	22	94	69	0	1	0	0	0	0	1	1	22.2491	73	41	15
45	93.5	99	35	282.857	267.143	1	71	Other	150	1	0	0	0	0	0	0	0	4	18	9	19	0	0	0	0	0	1	0	21.7738	45	22	8
46	69.8	90	60	150	116.333	1	71	Interstitial lung disease	50	1	1	0	1	1	0	0	5	10	42	6	22	0	0	0	0	0	1	0	#REF!	97	39	14
47	90.9	97	100	97	90.9	1	72	Interstitial lung disease	72	0	0	0	0	1	0	0	0	8	44	7	21	0	0	0	1	1	1	1	21.5611	54	23	11
48	68.1	97	50	194	136.2	2	72	Interstitial lung disease	0	0	1	0	0	1	0	0	5	6	6	4	0	1	1	1	1	1	1	0	19.0229	65	27	12
49	92.2	99	35	282.857	263.429	1	72	Aspiration pneumonia	35	0	1	0	0	0	0	0	0	14	70	8	20	0	0	0	0	0	1	0	#REF!	76	34	12
50	89.6	96	50	192	179.2	1	72	Viral/Pneumocystis pneumonia	15	0	1	0	0	1	0	1	5	49	58	49	0	1	1	0	1	1	1	0	21.0547	48	36	12
51	82.2	97	45	215.556	182.667	2	74	Interstitial lung disease	0	0	0	0	0	0	0	0	0	6	31	5	23	0	0	0	0	0	1	1	22.9778	45	20	9
52	80.6	96	50	192	161.2	1	74	Interstitial lung disease	68	0	0	1	1	1	0	0	2	26	31	21	7	1	0	0	1	1	1	0	22.5666	53	29	11
53	63.3	95	45	211.111	140.667	1	74	Bacterial pneumonia	27	1	1	0	1	0	0	0	0	7	68	12	16	0	0	0	0	0	1	0	38.5488	82	35	17
54	111.6	98	45	217.778	248	1	74	Bacterial pneumonia	108	1	0	0	0	0	0	0	0	29	55	55	0	1	0	0	1	1	1	0	#REF!	89	39	15
55	86.2	98	50	196	172.4	1	75	Interstitial lung disease	40	0	1	1	0	0	0	0	0	6	25	5	23	0	0	0	0	0	1	1	21.2305	67	26	11
56	120.8	97	50	194	241.6	1	75	Viral/Pneumocystis pneumonia	35	0	1	1	1	0	0	1	0	13	34	14	14	1	0	0	1	1	1	0	26.3111	54	27	11
57	82.1	95	50	190	164.2	1	76	Interstitial lung disease	40	1	1	0	1	0	0	0	0	11	11	11	17	1	1	1	1	1	1	0	#REF!	57	21	14
58	44.6	99	100	99	44.6	1	76	Interstitial lung disease	15	0	1	0	1	0	0	0	0	10	24	8	20	0	0	0	0	0	1	0	#REF!	78	30	16
59	95.6	97	100	97	95.6	1	76	Other	0	0	0	0	0	0	0	0	0	14	14	14	14	0	1	1	1	1	0	0	#REF!	74	42	15
60	80.3	97	70	138.571	114.714	1	76	Bacterial pneumonia	20	0	0	0	0	1	0	1	5	27	27	27	0	1	1	1	1	1	0	0	13.5602	101	45	21
61	84.2	98	45	217.778	187.111	2	77	Interstitial lung disease	30	0	0	0	0	0	0	0	0	3	17	3	25	0	0	0	0	0	1	0	#REF!	47	17	12
62	101.1	99	40	247.5	252.75	1	79	Bacterial pneumonia	0	0	0	0	0	1	0	0	0	13	79	4	24	0	0	0	0	0	1	1	20.3092	43	23	13
63	111.9	98	55	178.182	203.455	1	79	Bacterial pneumonia	50	0	1	0	1	0	0	0	0	23	102	38	0	1	0	0	0	0	0	0	21.4844	51	25	12
64	91.5	99	25	396	366	1	79	Interstitial lung disease	36	1	1	1	0	0	1	0	2	5	73	3	25	0	0	0	0	0	1	0	#REF!	61	25	13
65	72.7	95	60	158.333	121.167	1	79	Bacterial pneumonia	120	1	1	0	0	0	0	0	0	6	17	4	24	0	0	0	0	0	1	1	25.4222	71	30	14
66	84.3	98	50	196	168.6	2	79	Interstitial lung disease	0	0	0	0	0	0	0	0	0	6	27	4	24	0	0	0	0	0	1	1	#REF!	72	35	16
67	82.8	98	95	103.158	87.1579	1	79	Bacterial pneumonia	55	0	1	0	0	1	0	0	5	16	40	40	0	1	0	0	1	1	0	1	17.0392	74	39	14
68	69.3	96	100	96	69.3	2	79	Interstitial lung disease	125	0	1	0	0	0	1	1	5	15	110	10	18	0	0	0	0	0	1	1	23.1247	82	50	17
69	59.4	95	55	172.727	108	2	80	Bacterial pneumonia	0	0	0	1	0	0	0	0	5	10	79	7	21	0	0	0	0	0	1	1	17.1225	60	24	14
70	86.8	91	35	260	248	1	80	Interstitial lung disease	40	1	1	1	0	1	0	0	0	4	24	3	25	0	0	0	0	0	1	0	#REF!	57	26	10
71	77.6	100	40	250	194	1	80	Bacterial pneumonia	26	0	1	1	1	1	0	0	0	8	58	5	23	0	0	0	0	0	1	0	#REF!	58	28	11
72	73.2	99	60	165	122	1	81	Bacterial pneumonia	61	1	1	0	0	0	0	0	0	10	55	7	21	0	0	0	0	0	1	1	20.5457	48	24	13
73	73.1	95	55	172.727	132.909	2	81	Interstitial lung disease	0	0	0	0	0	0	0	0	0	5	5	5	0	0	1	1	1	1	1	1	#REF!	76	24	14
74	73.7	97	40	242.5	184.25	1	81	Interstitial lung disease	40	1	0	0	0	1	0	0	0	24	56	18	10	0	0	0	0	0	0	0	24.5153	63	27	13
75	78.5	98	35	280	224.286	1	81	Aspiration pneumonia	80	0	0	0	0	0	0	0	0	22	74	50	0	1	0	0	1	1	0	0	#REF!	75	33	11
76	63.1	91	35	260	180.286	1	81	Interstitial lung disease	55	1	1	0	0	1	0	0	5	20	100	17	11	1	1	1	1	1	1	0	#REF!	71	42	15
77	71.8	94	40	235	179.5	1	82	Interstitial lung disease	0	0	0	0	0	0	0	0	0	20	20	20	8	0	1	1	1	1	1	0	#REF!	43	23	9
78	136	96	35	274.286	388.571	2	82	Bacterial pneumonia	0	0	1	0	0	1	0	0	0	4	35	17	11	0	0	0	0	0	0	0	#REF!	67	26	10
79	158.2	96	60	160	263.667	1	83	Interstitial lung disease	57	1	1	1	0	0	0	0	0	28	37	34	0	1	0	0	1	1	1	1	20.8307	52	19	9
80	109.6	96	60	160	182.667	1	83	Bacterial pneumonia	90	1	1	0	0	0	1	0	5	11	32	9	19	0	0	0	0	0	0	0	#REF!	79	38	16
81	83.1	91	70	130	118.714	2	84	Bacterial pneumonia	0	0	1	0	0	0	0	1	0	10	100	24	4	0	0	0	0	0	0	0	#REF!	57	31	16
82	106.5	100	35	285.714	304.286	1	84	Bacterial pneumonia	50	0	0	0	0	1	0	0	0	11	19	15	13	0	0	0	1	1	1	1	15.4325	68	37	16
83	119.2	99	100	99	119.2	1	84	Bacterial pneumonia	0	0	0	0	1	0	0	0	0	31	31	31	0	1	1	0	1	1	1	0	#REF!	90	40	20
84	62.4	95	100	95	62.4	1	84	Bacterial pneumonia	60	0	1	0	0	0	0	0	0	26	26	26	0	0	1	1	1	1	1	1	21.9017	83	41	13
85	75.4	97	60	161.667	125.667	2	85	Bacterial pneumonia	0	0	1	0	1	0	1	0	5	8	43	36	0	0	0	0	1	1	1	0	24.897	75	32	14
86	73.6	65.6	40	164	184	1	85	Bacterial pneumonia	0	1	1	0	0	1	0	0	5	13	27	6	22	0	0	0	0	0	1	0	#REF!	82	47	17
87	57.4	93	45	206.667	127.556	1	86	Bacterial pneumonia	50	0	0	0	0	0	0	0	0	33	84	84	0	1	0	0	0	1	1	0	26.3892	50	28	12
88	96.3	97	40	242.5	240.75	1	87	Bacterial pneumonia	0	0	1	1	0	0	0	0	0	13	39	13	15	0	0	0	1	1	1	0	#REF!	56	17	14
89	72.2	93	70	132.857	103.143	2	87	Interstitial lung disease	21	0	1	1	0	0	0	0	5	4	5	4	0	0	1	1	1	1	1	1	23.0224	55	24	15
90	106	99	45	220	235.556	1	87	Bacterial pneumonia	41	0	0	0	0	1	0	0	0	27	74	53	0	1	0	0	0	1	1	1	23.053	60	32	14
91	133.3	100	50	200	266.6	1	87	Aspiration pneumonia	0	0	0	0	0	0	0	0	0	22	76	76	0	1	0	0	0	0	0	0	#REF!	64	34	15
92	100.6	98	40	245	251.5	2	87	Bacterial pneumonia	0	0	0	0	0	0	0	0	0	19	80	29	0	1	0	0	0	0	0	0	#REF!	86	40	17
93	76.6	96	65	147.692	117.846	2	88	Interstitial lung disease	0	0	0	0	0	0	0	0	5	13	19	13	0	0	1	1	1	1	1	1	24.422	66	39	15
94	67.8	91	30	303.333	226	1	90	Interstitial lung disease	60	1	1	0	0	0	0	0	5	12	58	10	18	0	0	0	1	1	1	0	#REF!	72	26	12
